# Supplementary material
Source: PubMed Central journal article supplement (PMC3927323)
Supplement: NIHMS548828-supplement-1_si_001.pdf [file NIHMS548828-supplement-1_si_001.pdf]

A Self-Cleaning Membrane to Extend the Lifetime of an Implanted Glucose Biosensor

**AUTHOR NAMES**

*Alexander A. Abraham,<sup>a</sup> Ruochong Fei,<sup>a</sup> Gerard L. Coté,<sup>a</sup> and Melissa A. Grunlan<sup>a,b\*</sup>*

**AUTHOR ADDRESS**

a: Department of Biomedical Engineering, Texas A&M University, College Station, TX  
77843-3120, USA

b: Materials Science and Engineering Program, Texas A&M University, College Station, TX,  
77843-3120, USA

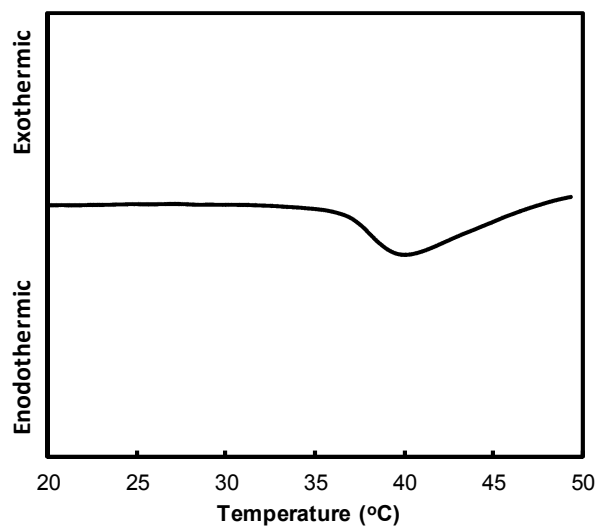

**Figure S1.** DSC thermogram of the DNNC hydrogel.

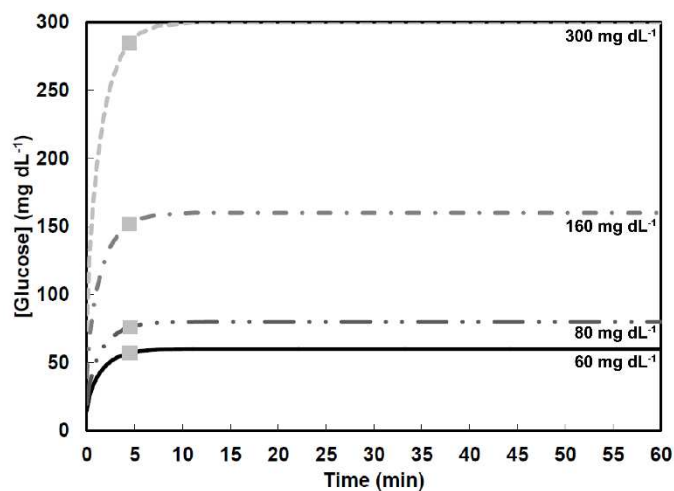

**Figure S2.** Decreasing the cylindrical diameter to 350  $\mu\text{m}$ , a computational model exhibited the average glucose concentration inside a DNNC hydrogel at 35  $^{\circ}\text{C}$  for constant environmental glucose levels of 300, 160, 80 and 60  $\text{mg dL}^{-1}$ . The glucose diffusion lag time (■) marks when the average internal hydrogel glucose concentration is 95% to that of the external environment. The mean glucose lag time was determined as  $4.48 \pm 0.02$  minutes.
